# Supplementary material for: A new urban surface model integrated in the large-eddy simulation model PALM
Source: Copernicus journal article supplement (doi:10.5194/gmd-2017-61), 2017-03-15
Supplement: Supplementary file [file gmd-2017-61-AC4-supplement.zip]

| variable                      | description                                                                                                                 | units                           |
|-------------------------------|-----------------------------------------------------------------------------------------------------------------------------|---------------------------------|
| $C_0$                         | heat capacity of the surface skin layer                                                                                     | $\text{J m}^{-2} \text{K}^{-1}$ |
| $T_0$                         | temperature of the surface skin layer                                                                                       | K                               |
| $R_n$                         | net radiation                                                                                                               | $\text{W m}^{-2}$               |
| $H$                           | sensible heat flux at the surface                                                                                           | $\text{W m}^{-2}$               |
| $G$                           | ground heat flux (to ground, roof or wall)                                                                                  | $\text{W m}^{-2}$               |
| $\theta_0$                    | potential temperature at the surface                                                                                        | K                               |
| $\theta_1$                    | potential temperature of the air grid adjacent to the surface                                                               | K                               |
| $h$                           | heat flux coefficient                                                                                                       | $\text{W m}^{-2} \text{K}^{-1}$ |
| $T_{matter,1}$                | temperature of the outermost layer of the material                                                                          | K                               |
| $\Lambda$                     | heat conductivity between the skin layer and the first grid level in the material                                           | $\text{W m}^{-2} \text{K}^{-1}$ |
| $F_{A \rightarrow B}^d$       | differential view factor                                                                                                    | $\text{m}^{-2}$                 |
| $\hat{F}_{A \rightarrow B}^d$ | normalized differential view factor                                                                                         | $\text{m}^{-2}$                 |
| $A(B)$                        | surface area of face $B$                                                                                                    | $\text{m}^2$                    |
| $\theta_A, \theta_B$          | angles between face normals and the connecting ray                                                                          | rad                             |
| $s$                           | length of ray                                                                                                               | m                               |
| $J_{e,A \rightarrow B}$       | irradiance of face $B$ that comes from face $A$                                                                             |                                 |
| $E_{e,A}$                     | radiosity of face $A$                                                                                                       | $\text{W m}^{-2}$               |
| $SVF_{A \rightarrow B}$       | irradiance factor                                                                                                           | 1 (dimensionless)               |
| $RCSF_{C,A \rightarrow B}$    | ray canopy sink factor of the ray $A \rightarrow B$ and the grid box $C$                                                    | 1                               |
| $a_C$                         | leaf area density of grid box $C$                                                                                           | $\text{m}^2 \text{m}^{-3}$      |
| $s_C$                         | length of the ray's intersection with box $C$                                                                               | m                               |
| $\alpha$                      | extinction coefficient                                                                                                      | 1                               |
| $T_{A \rightarrow B}$         | total transmittance of the ray $A \rightarrow B$                                                                            | 1                               |
| $\Phi_e$                      | radiant flux                                                                                                                | W                               |
| $CSF_{C,A}$                   | ratio between the radiant flux absorbed within plant canopy box $C$ originating from face $A$ and the radiosity of face $A$ | $\text{m}^{-2}$                 |
| $E_{e,dir}$                   | direct solar irradiance                                                                                                     | $\text{W m}^{-2}$               |
| $\mathcal{A}'_C$              | cross-sectional area of $C$ viewed from the direction of the solar radiation                                                | $\text{m}^{-2}$                 |
| $\varepsilon$                 | surface emissivity                                                                                                          | 1                               |

Table S1: Variables description

| category | surface material       | storage material          | $\varepsilon$ | $\Lambda$ | roughness | roughness_h | $C_0$ | thickness | $\rho c$ | lambda_h |
|----------|------------------------|---------------------------|---------------|-----------|-----------|-------------|-------|-----------|----------|----------|
| 1        | asphalt                | asphalt concrete/gravel   | 0.93          | 41        | 0.002     | 0.002       | 14472 | 1         | 1360     | 1.6      |
| 2        | pavement cobbles light | white granite/gravel/sand | 0.93          | 54        | 0.003     | 0.003       | 16737 | 1         | 1360     | 1.6      |
| 3        | paving blocks          | concrete/gravel           | 0.93          | 66        | 0.003     | 0.003       | 22264 | 1         | 1360     | 1.6      |
| 4        | pavement cobble        | granite/gravel/soil       | 0.93          | 103       | 0.01      | 0.01        | 28629 | 1         | 1360     | 1.6      |
| 5        | playground             | plastic/sand              | 0.93          | 21        | 0.002     | 0.002       | 15972 | 1         | 1320     | 1.5      |
| 6        | sand                   | sand                      | 0.76          | 41        | 0.01      | 0.01        | 16571 | 1         | 1370     | 0.7      |
| 7        | grass                  | soil                      | 0.96          | 41        | 0.01      | 0.01        | 9075  | 1         | 1370     | 1.5      |
| 101      | asphalt belt           | softwood                  | 0.93          | 69        | 0.001     | 0.001       | 3473  | 0.3       | 1144     | 0.3      |
| 102      | sheet metal            | softwood                  | 0.93          | 69        | 0.001     | 0.001       | 4153  | 0.3       | 1144     | 0.3      |
| 103      | concrete/fired tile    | concrete/brick/wood       | 0.7           | 83        | 0.01      | 0.01        | 6353  | 0.35      | 1144     | 0.5      |
| 104      | grass                  | soil                      | 0.96          | 92        | 0.01      | 0.01        | 8168  | 0.45      | 1500     | 1        |
| 201      | metal plate            | brick                     | 0.93          | 118       | 0.0002    | 0.0002      | 4235  | 0.35      | 1510     | 1        |
| 202      | brick                  | brick                     | 0.93          | 118       | 0.0012    | 0.0012      | 6395  | 0.35      | 1510     | 1        |
| 203      | smooth brick           | brick                     | 0.93          | 118       | 0.001     | 0.001       | 6395  | 0.35      | 1510     | 1        |
| 204      | smooth pavement        | brick                     | 0.93          | 83        | 0.0003    | 0.0003      | 7454  | 0.35      | 1510     | 1        |
| 205      | smooth cobblestone     | brick                     | 0.93          | 59        | 0.0007    | 0.0007      | 7454  | 0.35      | 1510     | 1        |
| 206      | plaster                | brick                     | 0.93          | 83        | 0.0009    | 0.0009      | 7454  | 0.35      | 1510     | 1        |
| 207      | plaster                | burnt breeze block        | 0.93          | 83        | 0.0009    | 0.0009      | 6776  | 0.35      | 1000     | 0.7      |
| 208      | plaster + bricks       | brick                     | 0.93          | 118       | 0.001     | 0.001       | 6564  | 0.35      | 1510     | 1        |
| 209      | plaster + vegetation   | brick                     | 0.95          | 118       | 0.005     | 0.005       | 6564  | 0.35      | 1510     | 1        |
| 210      | plaster + tiling       | brick                     | 0.93          | 118       | 0.001     | 0.001       | 7411  | 0.35      | 1510     | 1        |
| 211      | plaster + glass        | brick                     | 0.93          | 83        | 0.0007    | 0.0007      | 8894  | 0.35      | 1510     | 1        |
| 212      | plastic                | brick                     | 0.93          | 83        | 0.0007    | 0.0007      | 8470  | 0.35      | 1510     | 1        |
| 213      | glass                  | brick                     | 0.92          | 118       | 0.0007    | 0.0007      | 5506  | 0.35      | 1510     | 1        |
| 214      | glass                  | insulation                | 0.92          | 118       | 0.0007    | 0.0007      | 4235  | 0.35      | 1000     | 0.5      |
| 215      | plaster + glass        | burnt breeze block        | 0.92          | 138       | 0.0007    | 0.0007      | 3630  | 0.3       | 1000     | 0.5      |
| 216      | plaster + glass        | insulation                | 0.93          | 138       | 0.0008    | 0.0008      | 8894  | 0.3       | 1000     | 0.5      |
| 217      | decorated plaster      | brick                     | 0.93          | 118       | 0.0011    | 0.0011      | 7454  | 0.35      | 1510     | 1        |

Table S2:  $\varepsilon$  ... emissivity,  $\Lambda$  ... heat conductivity of the surface skin layer ( $\text{W m}^{-2} \text{K}^{-1}$ ), *roughness* applies to momentum variables while *roughness\_h* applies to scalar variables,  $C_0$  ... surface skin layer heat capacity ( $\text{J m}^{-2} \text{K}^{-1}$ ), thickness ... (m),  $\rho c$  ... volumetric heat capacity of the material ( $\text{kJ m}^{-3} \text{K}^{-1}$ ), *lambda\_h* ... thermal conductivity ( $\text{W m}^{-1} \text{K}^{-1}$ )

| location / point | height (m) | category | albedo |
|------------------|------------|----------|--------|
| Loc. 1 / point 1 | 13.3       | 207      | 0.4    |
| Loc. 1 / point 2 | 5.6        | 207      | 0.4    |
| Loc. 1 / point 3 | 13.4       | 206      | 0.3    |
| Loc. 1 / point 4 | 13.4       | 206      | 0.3    |
| Loc. 1 / point 5 | 8.4        | 206      | 0.3    |
| Loc. 1 / point 6 | 4          | 206      | 0.4    |
| Loc. 2 / point 1 | 4.3        | 217      | 0.5    |
| Loc. 2 / point 2 | 1.1        | 203      | 0.5    |
| Loc. 2 / point 3 | 6.2        | 217      | 0.5    |
| Loc. 2 / point 4 | 8.6        | 217      | 0.5    |
| Loc. 2 / point 5 | 1.1        | 203      | 0.5    |
| Loc. 3 / point 1 | 8.9        | 206      | 0.2    |
| Loc. 3 / point 2 | 5.2        | 206      | 0.2    |
| Loc. 3 / point 3 | 9          | 206      | 0.2    |
| Loc. 3 / point 4 | 1.4        | 206      | 0.7    |
| Loc. 4 / point 1 | 3.3        | 206      | 0.4    |
| Loc. 4 / point 2 | 6.1        | 206      | 0.2    |
| Loc. 4 / point 3 | 14.5       | 206      | 0.2    |
| Loc. 4 / point 4 | 14.6       | 216      | 0.6    |
| Loc. 4 / point 5 | 14.6       | 216      | 0.6    |
| Loc. 4 / point 6 | 3.6        | 214      | 0.6    |
| Loc. 4 / point 7 | 1.8        | 214      | 0.6    |
| Loc. 5 / point 1 | 2.5        | 207      | 0.7    |
| Loc. 5 / point 2 | 5.9        | 207      | 0.15   |
| Loc. 5 / point 3 | 13.2       | 207      | 0.15   |
| Loc. 5 / point 4 | 2.2        | 203      | 0.35   |
| Loc. 5 / point 5 | 13.4       | 206      | 0.35   |
| Loc. 6 / point 1 | 2.3        | 207      | 0.15   |
| Loc. 6 / point 2 | 5.9        | 207      | 0.15   |
| Loc. 6 / point 3 | 7.9        | 207      | 0.15   |
| Loc. 6 / point 4 | 2.3        | 217      | 0.65   |
| Loc. 6 / point 5 | 6          | 217      | 0.3    |
| Loc. 6 / point 6 | 8.7        | 217      | 0.3    |
| Loc. 7 / point 1 | 2.4        | 217      | 0.55   |
| Loc. 7 / point 2 | 6.6        | 217      | 0.55   |
| Loc. 7 / point 3 | 9.8        | 217      | 0.55   |
| Loc. 8 / point 1 | 0          | 2        | 0.4    |
| Loc. 8 / point 2 | 0          | 1        | 0.1    |
| Loc. 8 / point 3 | 0          | 1        | 0.3    |
| Loc. 8 / point 4 | 0          | 1        | 0.1    |
| Loc. 8 / point 5 | 0          | 4        | 0.3    |
| Loc. 8 / point 6 | 0          | 4        | 0.3    |
| Loc. 8 / point 7 | 0          | 4        | 0.3    |
| Loc. 8 / point 8 | 0          | 4        | 0.3    |
| Loc. 9 / point 1 | 4          | 206      | 0.45   |
| Loc. 9 / point 2 | 7.4        | 206      | 0.45   |
| Loc. 9 / point 3 | 9.9        | 206      | 0.45   |
| Loc. 9 / point 4 | 1          | 206      | 0.4    |
| Loc. 9 / point 5 | 4          | 206      | 0.4    |

Table S3: Parameters of evaluation points

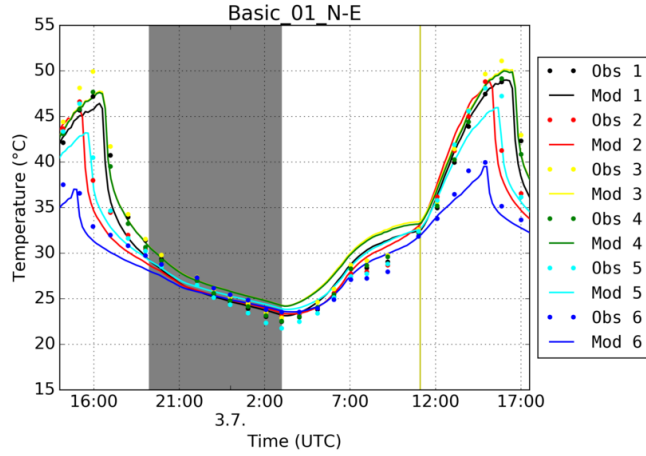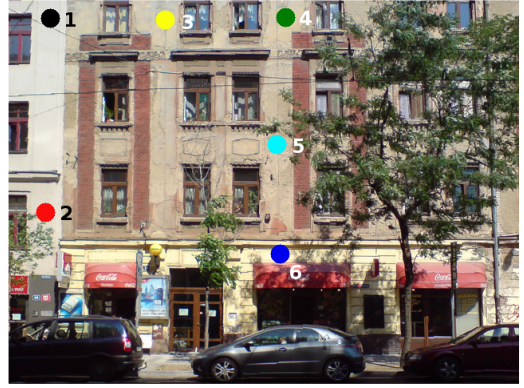

Figure S1: Comparison of modelled and observed surface temperatures from the observation location 1 (50.1034392N, 14.4498325E) – view of west facing wall. The graph shows comparisons for chosen evaluation points for the period of observation campaign from 2 July 2015, 14:00 UTC to 3 July 2015, 17:00 UTC. The solid line represents modelled values while the dots show the observed values. The shaded area depicts nighttime and yellow vertical line depicts solar noon.

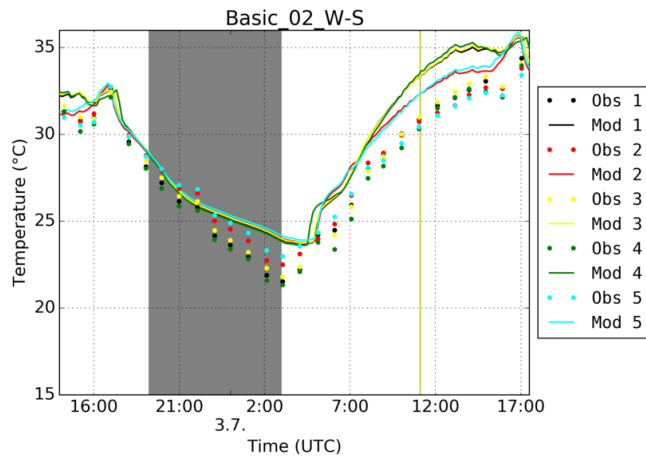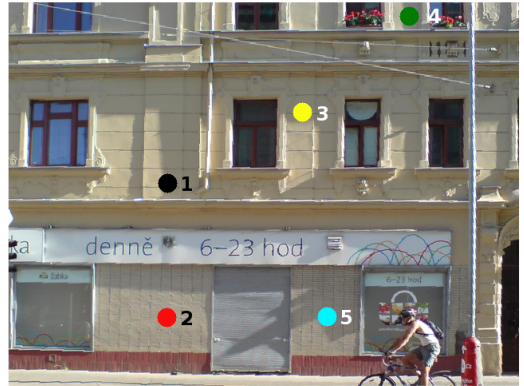

Figure S2: As Fig. S1 for location 2 (50.1032714N, 14.4496286E) — view of north facing wall.

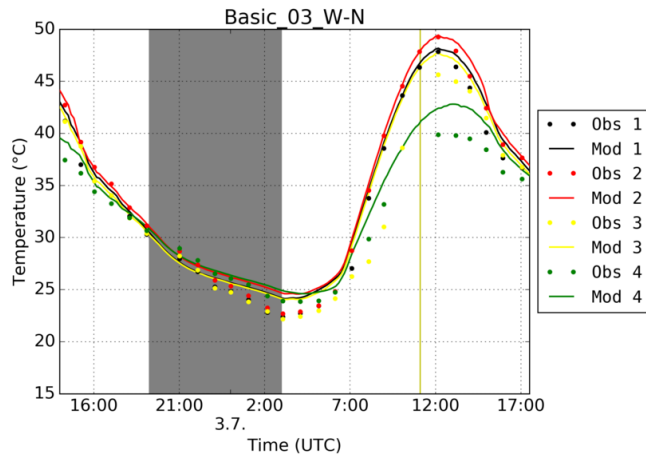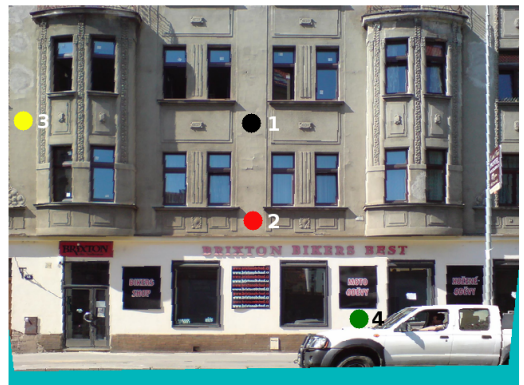

Figure S3: As Fig. S1 for location 3 (50.1031717N, 14.4493228E) — view of south facing wall.



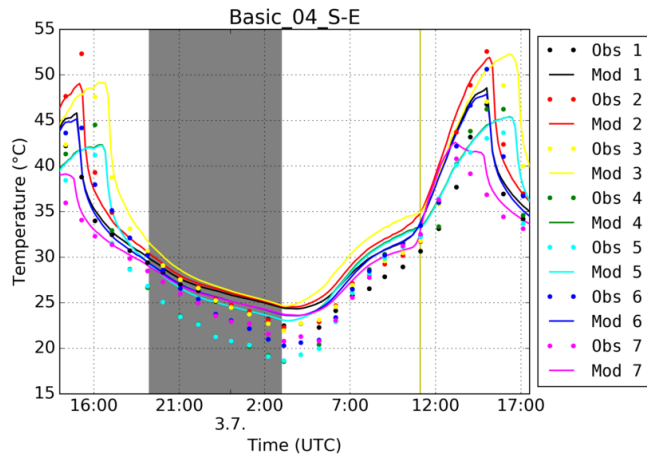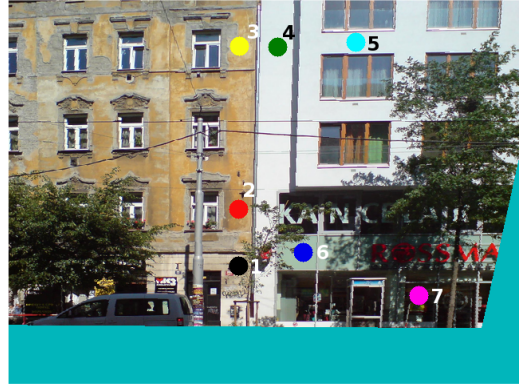

Figure S4: As Fig. S1 for location 4 (50.1028758N, 14.4498500E) — view of west facing wall.

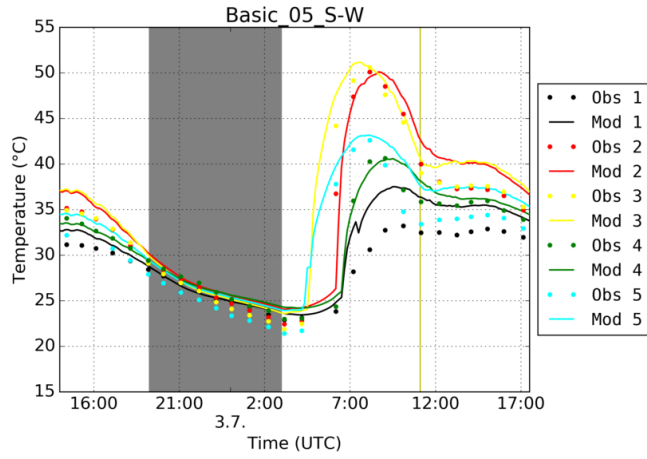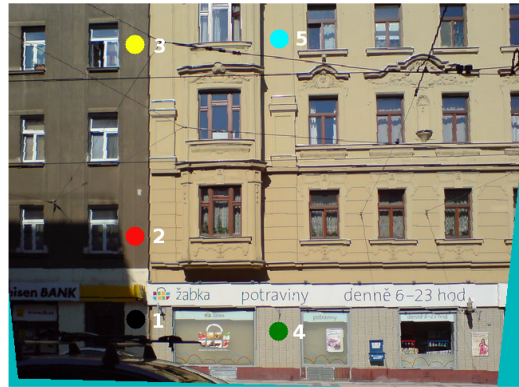

Figure S5: As Fig. S1 for location 5 (50.1029967N, 14.4500953E) — view of east facing wall.

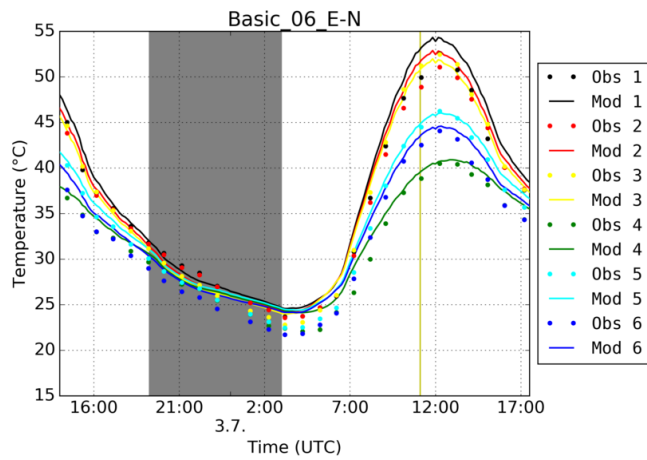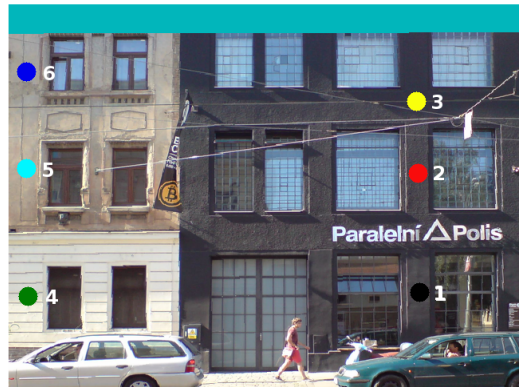

Figure S6: As Fig. S1 for location 6 (50.1031808N, 14.4504211E) — view of south facing wall.

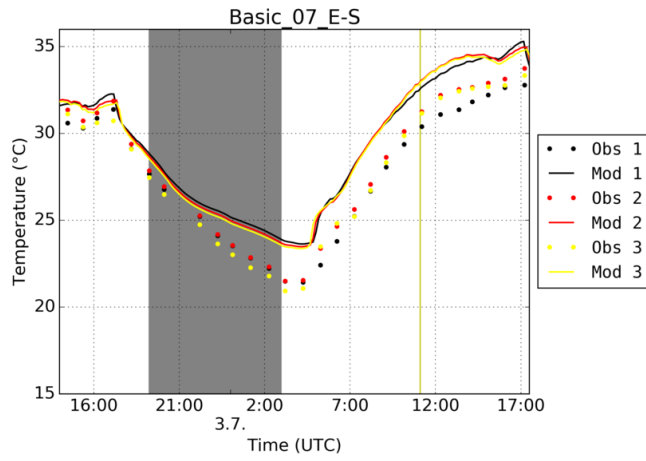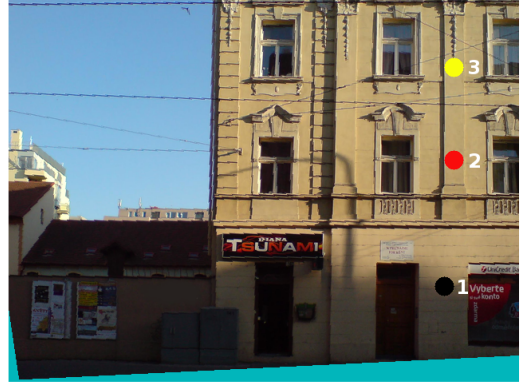

Figure S7: As Fig. S1 for location 7 (50.1032928N, 14.4503969E) — view of north facing wall.

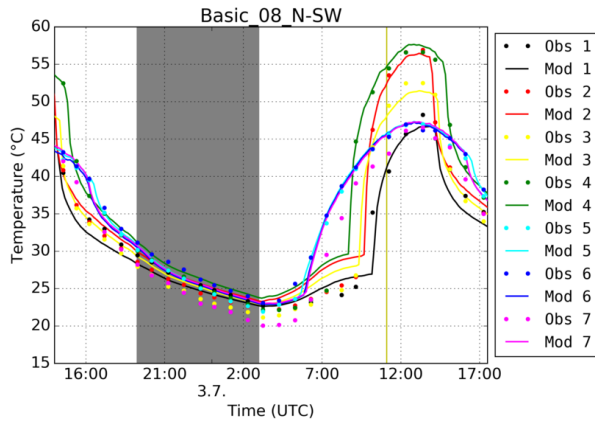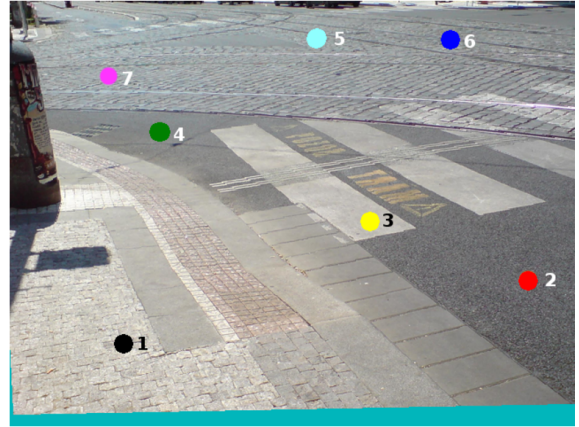

Figure S8: As Fig. S1 for location 8 (50.1033969N, 14.4500697E) — view of ground on the crossroads.

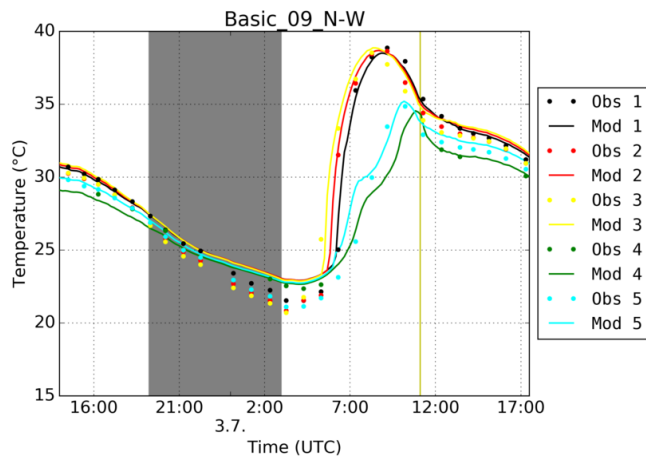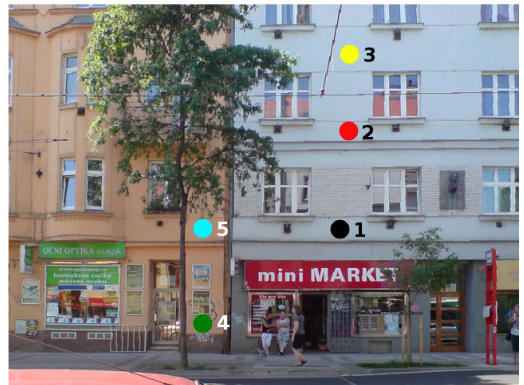

Figure S9: As Fig. S1 for location 9 (50.1035397N, 14.4500606E) — view of east facing wall.

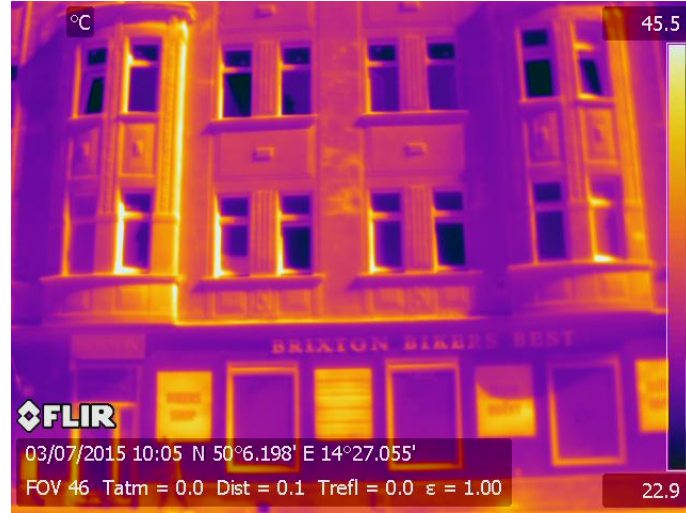

Figure S10: Infrared snapshot from observation location 3 (50.1035397N, 14.4500606E) — view of south facing wall from 3 July 2015 08:05 UTC (10:05 local time).

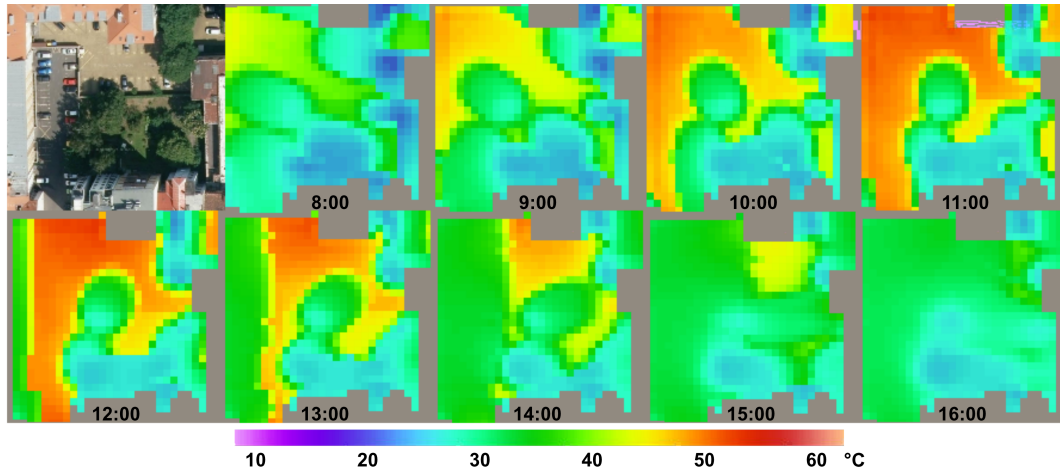

Figure S11: Aerial photo and modelled surface temperature of the pavement in the courtyard in the south-west corner of the domain (50.1036806N, 14.4475922E) for hours from 08:00 UTC to 16:00 UTC on 3 July.

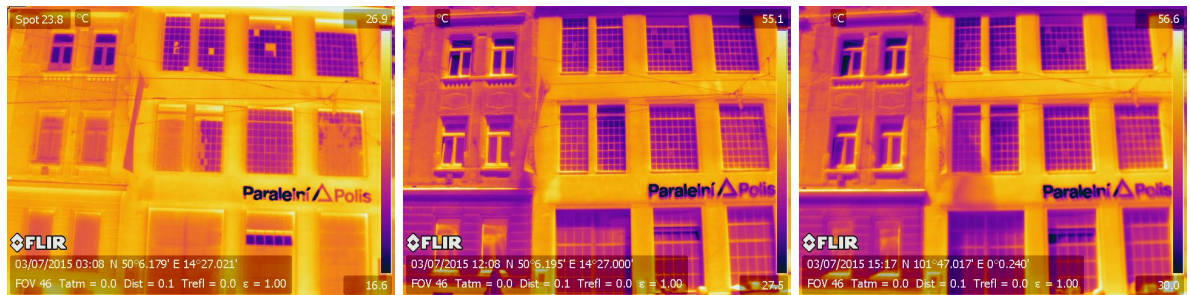

Figure S12: Three infrared snapshots from observation location 6 — view of south facing wall from 3 July 2015 01:08 UTC (03:08 local time), 10:08 UTC (12:08 local time) and 13:17 UTC (15:17 local time).
